# Supplementary material
Source: PubMed Central journal article supplement (PMC9977243)
Supplement: izac102_suppl_supplementary_table-1.pdf [file izac102_suppl_supplementary_table-1.pdf]

**Supplemental Table 1: Screening Tool Components and Scoring Breakdown**

| Screening Tool | Components of Screening Tool                                                                                                                                                                                                                                                                                                                                                                                                                                                                                                                                                                                                                                                                                        | Score Breakdown                                                                                                                                                                       |
|----------------|---------------------------------------------------------------------------------------------------------------------------------------------------------------------------------------------------------------------------------------------------------------------------------------------------------------------------------------------------------------------------------------------------------------------------------------------------------------------------------------------------------------------------------------------------------------------------------------------------------------------------------------------------------------------------------------------------------------------|---------------------------------------------------------------------------------------------------------------------------------------------------------------------------------------|
| MUST           | BMI kg/m <sup>2</sup> <ul style="list-style-type: none"> <li>• &gt;20: 0 points</li> <li>• 18.5-20: 1 point</li> <li>• &lt;18.5: 2 points</li> </ul> Weight Loss (Unintentional) <ul style="list-style-type: none"> <li>• &lt;5%: 0 points</li> <li>• 5-10%: 1 point</li> <li>• &gt;10%: 2 points</li> </ul> Acute illness: no nutritional intake for >5 days: 2 points                                                                                                                                                                                                                                                                                                                                             | Total Points: <ul style="list-style-type: none"> <li>• 0: Low Risk</li> <li>• 1: Moderate Risk</li> <li>• ≥2: High Risk</li> </ul>                                                    |
| SNAQ           | Weight Loss (Unintentional) <ul style="list-style-type: none"> <li>• &gt;6 kg in the last 6 months: 3 points</li> <li>• &gt;3 kg in the past 1 month: 2 points</li> </ul> Decreased appetite in the last month? <ul style="list-style-type: none"> <li>• Yes: 1 point</li> <li>• No: 0 points</li> </ul> Supplemental Drinks/Tube Feeding in past month? <ul style="list-style-type: none"> <li>• Yes: 1 point</li> <li>• No: 0 points</li> </ul>                                                                                                                                                                                                                                                                   | Total Points: <ul style="list-style-type: none"> <li>• 1: Low Risk</li> <li>• 2: Moderately malnourished</li> <li>• 3: severely malnourished</li> </ul>                               |
| NRI            | Serum Albumin (g/dL)<br>Present weight (lbs)<br>Usual Weight (lbs) [Stable body weight for last 6 months]<br><br>NRI: (1.519 * serum albumin) + (41.7 * present weight in kg/ usual weight in kg)                                                                                                                                                                                                                                                                                                                                                                                                                                                                                                                   | NRI Score: <ul style="list-style-type: none"> <li>• &gt;100: No Risk</li> <li>• 97.6-100.0: Mild Risk</li> <li>• 83.5-97.5: Moderate Risk</li> <li>• &lt;83.5: Severe Risk</li> </ul> |
| MIRT           | BMI (kg/m <sup>2</sup> ) <ul style="list-style-type: none"> <li>• &gt;20: 0 points</li> <li>• 18.5-20: 1 point</li> <li>• &lt;18.5: 2 points</li> </ul> Weight Loss (%) in past 3 months <ul style="list-style-type: none"> <li>• &lt;5%: 0 points</li> <li>• 5-&lt;10%: 1 point</li> <li>• ≥10%: 2 points</li> </ul> CRP (mg/l) <ul style="list-style-type: none"> <li>• &lt;5: 0 points</li> <li>• 5-50: 2 points</li> <li>• ≥50: 3 points</li> </ul>                                                                                                                                                                                                                                                             | Score of 3 or more points is high risk for malnutrition and is associated with bad outcomes in IBD and high                                                                           |
| SaskIBD-NR     | Symptoms of Nausea, Vomiting, Diarrhea or Poor Appetite for >2 weeks: <ul style="list-style-type: none"> <li>• No symptoms: 0 points</li> <li>• 1-2 symptoms: 1 point</li> <li>• ≥3 symptoms: 2 points</li> </ul> Weight Loss (Unintentional) <ul style="list-style-type: none"> <li>• No: 0 points</li> <li>• "Unsure": 1 point</li> <li>• Yes: &lt;5 lbs: 0 points</li> <li>• Yes: 5-10 lbs: 1 point</li> <li>• Yes: 10-15 lbs: 2 points</li> <li>• Yes: &gt;15 lbs: 3 points</li> </ul> Decreased Appetite: <ul style="list-style-type: none"> <li>• No: 0 points</li> <li>• Yes: 2 points</li> </ul> Food Restriction <ul style="list-style-type: none"> <li>• No: 0 points</li> <li>• Yes: 2 points</li> </ul> | Total Points: <ul style="list-style-type: none"> <li>• 0-2: Low Risk</li> <li>• 3-4: Medium Risk</li> <li>• ≥5: High Risk</li> </ul>                                                  |
